# Supplementary material for: Inferring sediment-discharge event types in an alpine catchment from sub-daily time series
Source: Copernicus journal article supplement (doi:10.5194/hess-2023-300), 2024-01-16
Supplement: Supplementary file [file hess-2023-300-AC1-supplement.pdf]

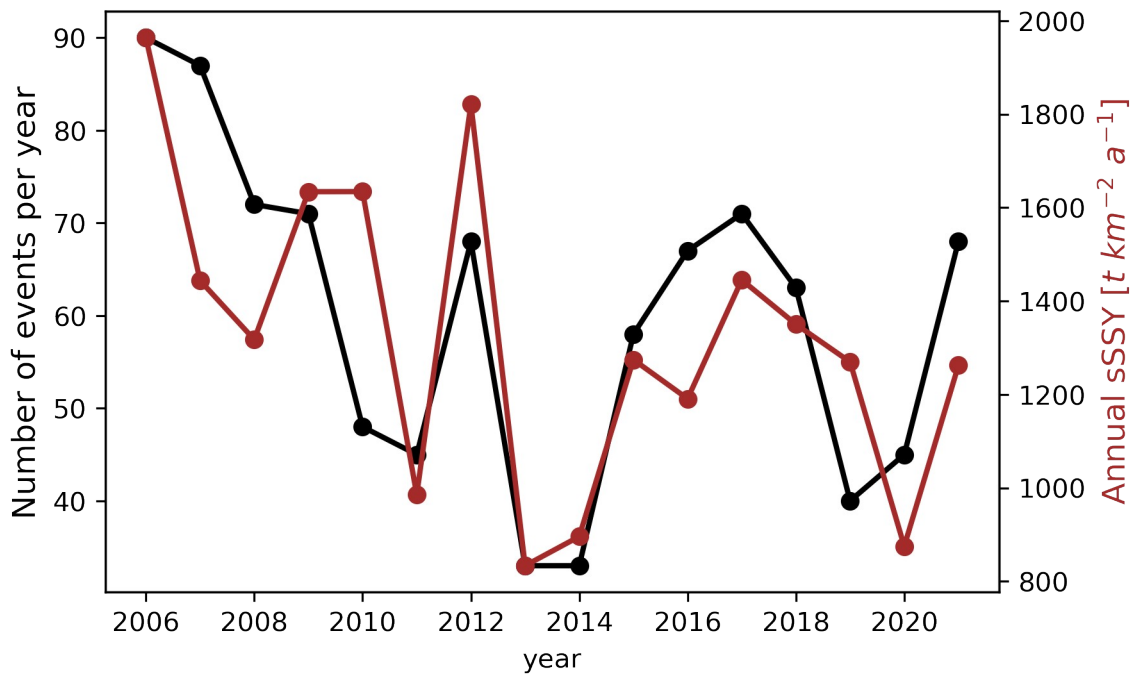

Figure 1: Event numbers and annual suspended sediment yield

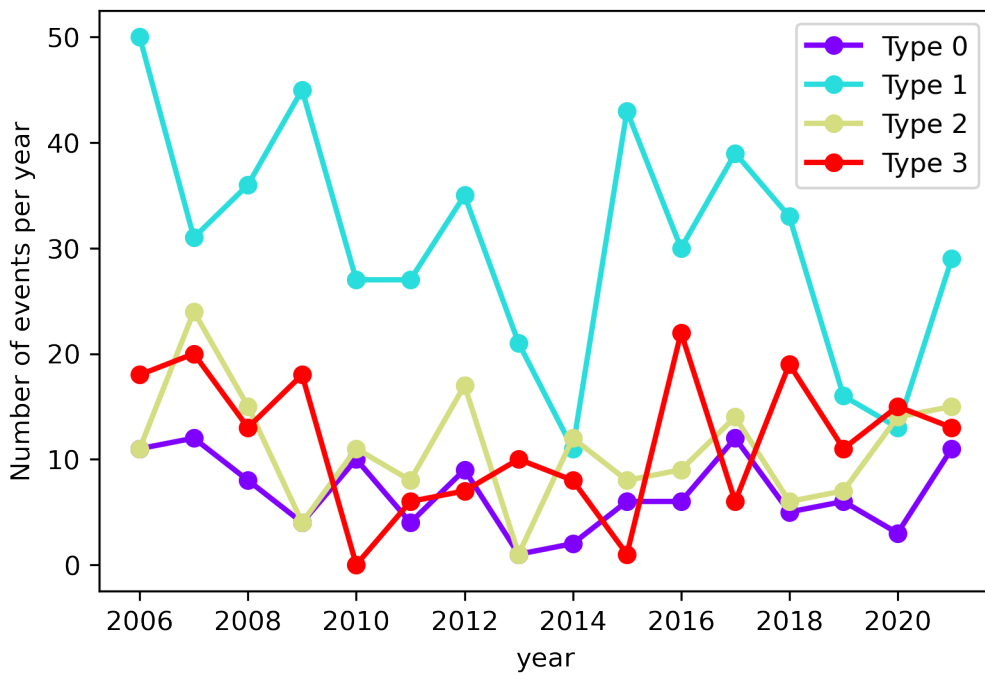

Figure 2: Event type frequency over the study period

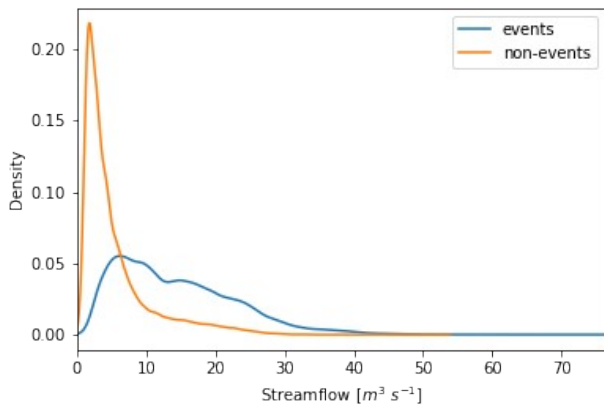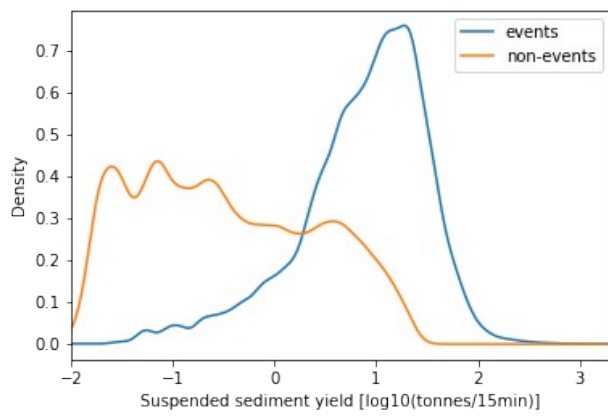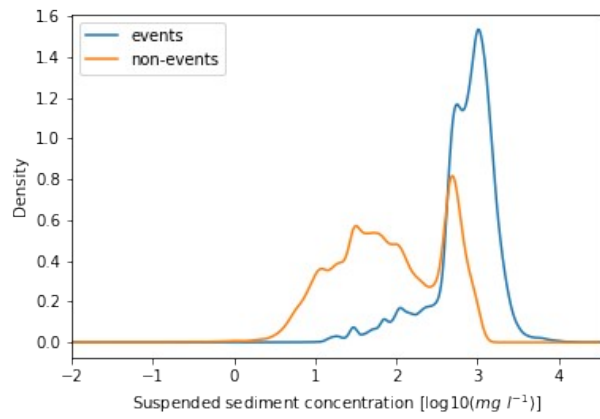

Figure 3: Difference in time steps during events and outside of events (non-events)
