# Supplementary material for: Inferring sediment-discharge event types in an alpine catchment from sub-daily time series
Source: Copernicus journal article supplement (doi:10.5194/hess-2023-300), 2024-01-16
Supplement: Supplementary file [file hess-2023-300-AC2-supplement.pdf]

**Attachment to Authors' reply to Anonymous Referee #2 from 21 Feb 2024**

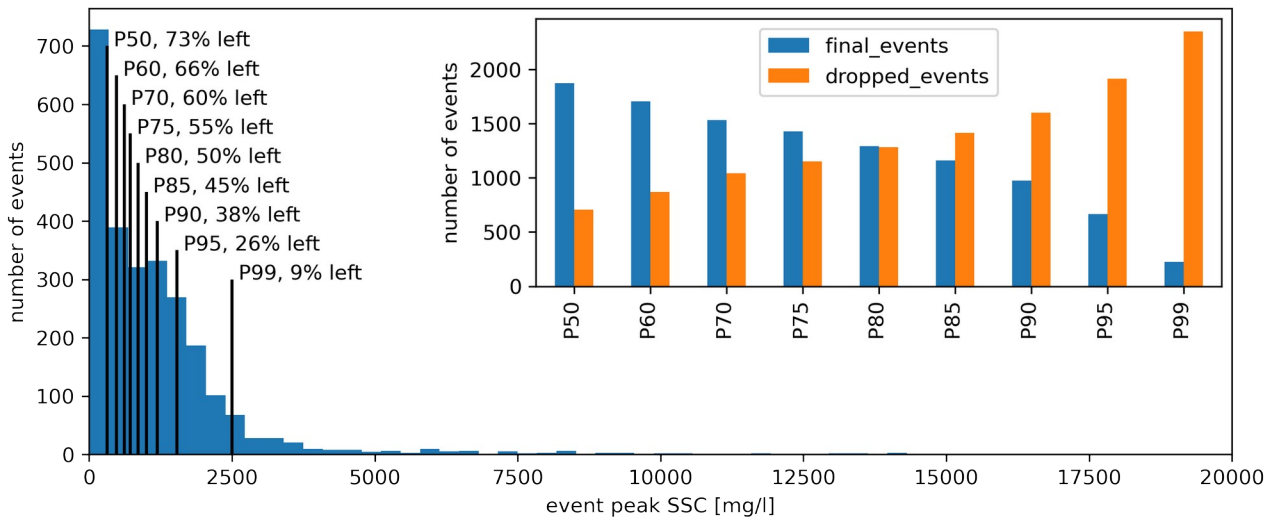

Figure 1: Sensitivity of event detection to choice of peak suspended sediment concentration (SSC) threshold.

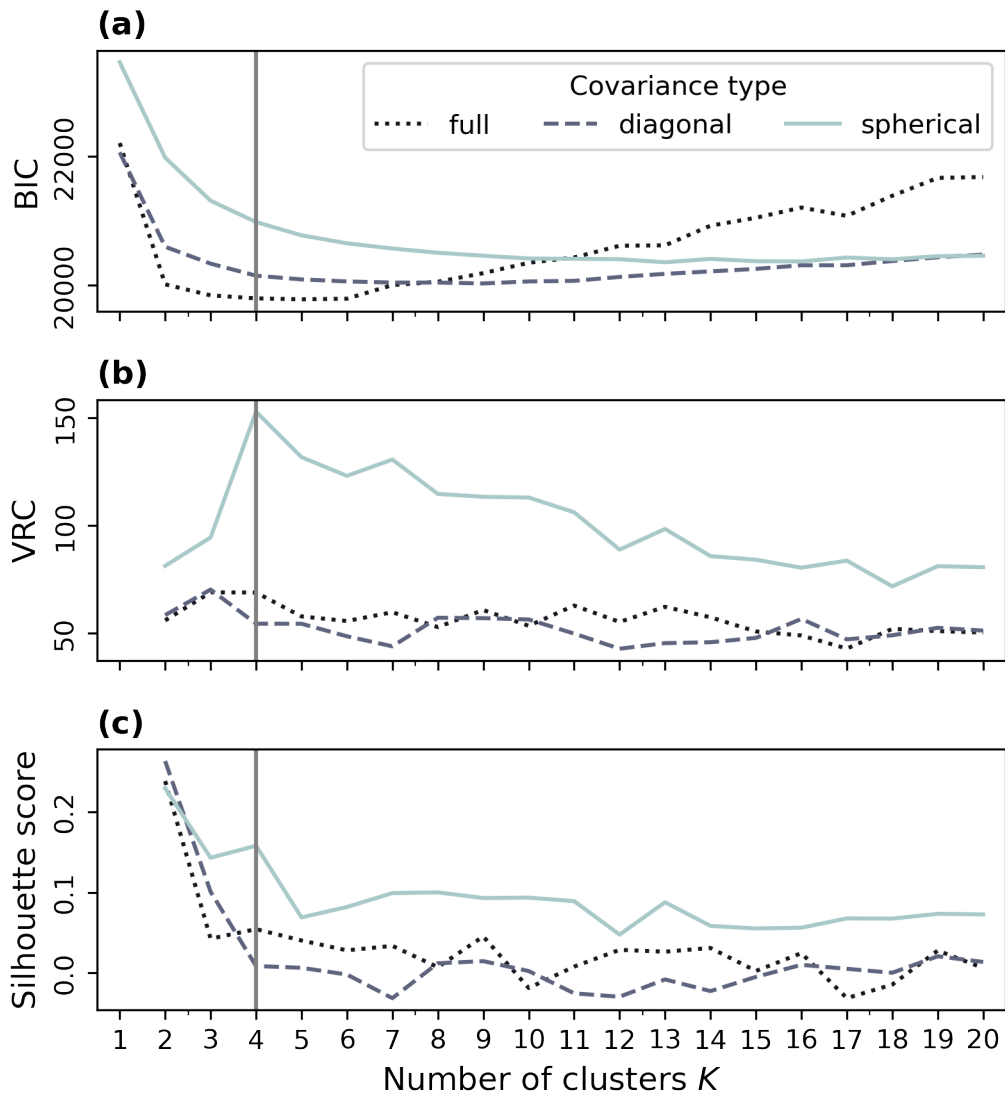

Figure 2: Proposed changes to figure 6 in manuscript

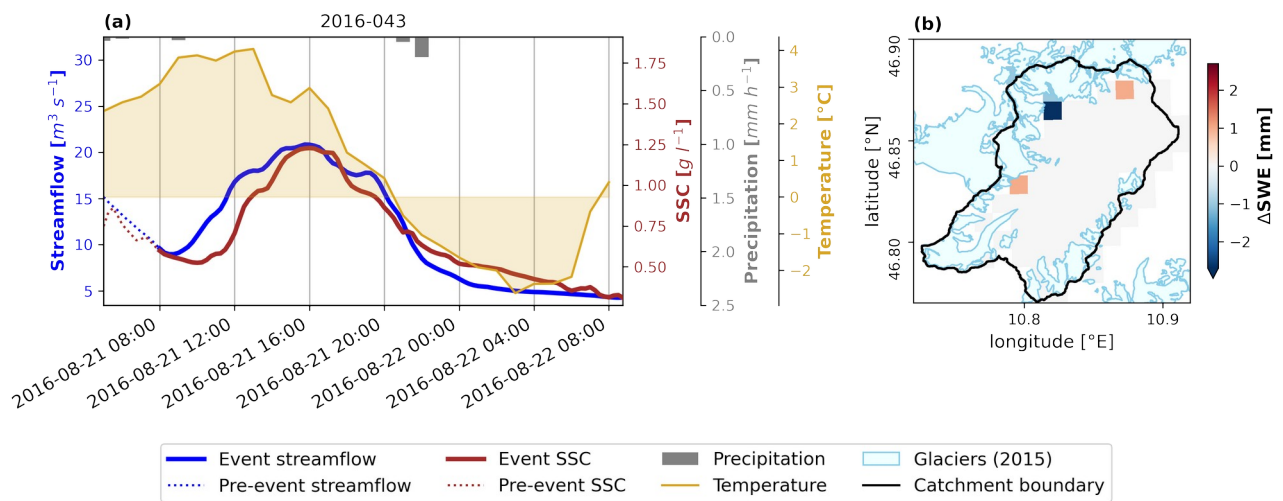

Figure 3: Suggested update of figures 10-13.
